# Supplementary material
Source: publisher figshare collection journal article supplement (https://gsapubs.figshare.com/articles/dataset/_/12530555)
Supplement: Supplementary file 1 [file 1]

Aeromagnetic contours (dark blue lines) from North American Magnetic Map (2002) grid, reprojected to Transverse Mercator Projection, base latitude of 0°, central meridian of -114°W. 1 km grid. Note mismatches as much as 2 km in registration between the geologic map base and the magnetic data. Red circles are locations of maximum horizontal gradient, with larger circles denoting maximum horizontal gradients larger than the mean and smaller circles denoting maximum horizontal gradients smaller than the mean. Contour intervals 50 and 200 nT.

Aeromagnetic contours and maximum horizontal gradient data superposed on reconnaissance geologic maps of Baja California (Gastil et al., 1975). Note: Mismatches between the tick marks from the aeromagnetic overlay and the geologic base may be as great as 2 km, likely because of the age of the base map used in Gastil et al. (1975).

# RECONOCIMIENTO GEOLOGICO del Estado de BAJA CALIFORNIA

PREPARADO POR LOS ESTUDIANTES Y PERSONAL DE LA UNIVERSIDAD AUTONOMA DE BAJA CALIFORNIA Y SAN DIEGO STATE UNIVERSITY

COMPILADO POR R. GORDON GASTIL, RICHARD P. PHILLIPS, Y EDWIN C. ALLISON

ESCALA 1:250,000

1971

REFERENCIAS Y AGRADECIMIENTOS EN GEOLOGICAL SOCIETY OF AMERICA MEMOIR 140

## LEYENDA

### UNIDADES DE ROCA

#### POST-BATOLITICAS

##### ROCAS SEDIMENTARIAS

CUATERNARIO  
al, aluvial; Qd, medanos

Qm, marino; Qf, fluvial  
Ql, lacustre

PLIOCENO  
Tm, marino; Tpl, fluvial

MIOCENO  
Tm, marino; Tmf, fluvial

TERCIARIO INFERIOR  
Tm, marino; Tm, Paleozoico  
m, marino; f, fluvial  
Tc, conglomerado

CRETACEO SUPERIOR  
Kt, Grupo Rosario  
m, marino; f, fluvial  
Kc, Formación Redondo

ROCAS VOLCANICAS POST-BATOLITICAS

Qb, Cuaternario basalto

Tpb, Plioceno basalto y andesito basáltico

Tmb, Mioceno basalto y andesito basáltico

Tp, Plioceno; Tm, Mioceno  
v, volcánicos no diferenciados; u, andesito  
v, riolito y dacito

#### ROCAS BATOLITICAS

ad, adamello y granito

gd, granodiorito

t, tonalita

gr, no diferenciada

gb, gabro

d, diabasa

#### ROCAS PRE-BATOLITICAS

Ka, Formación Altiplano

u, andesito; v, volcánico

m, caliza

Ja, T. Jurásico ?

pbv, volcánicos no diferenciados

plm, metasedimentario

plv, secuencia Paleozoica ?

sl, gneiso; om, omphacitita

sch, esquistos; gn, gneis

ph, gneis

ph, no diferenciado

mp, plúcticas y

metamórficas mezcladas

### SÍMBOLOS

#### CONTACTOS DE LAS UNIDADES DE ROCA

Con líneas interrumpidas donde no se puede estar seguro

#### INCLINACIONES

##### ESTRATIFICACION

medida observada foto interpretada

horizontal vertical

##### FOLIACION

medida observada

diaclico

Rumbo en rocas plúcticas

Rumbo en rocas pre-batolíticas

##### FLEQUES

Anticlinal

Sinclinal

##### FALLAS

Normal

Falla de rumbo

Sin especificar

Cubierta incierta observada

lado de

desplazamiento

Centro de erupción

Dique

Mina o prospecto

Manantial

Pozo

Habitación

Aeropuerto

Sendero

Carretera transitable

Carretera transitable

todo el año

un espacio de seces

• K.A. 501 Localización de las

muestras analizadas

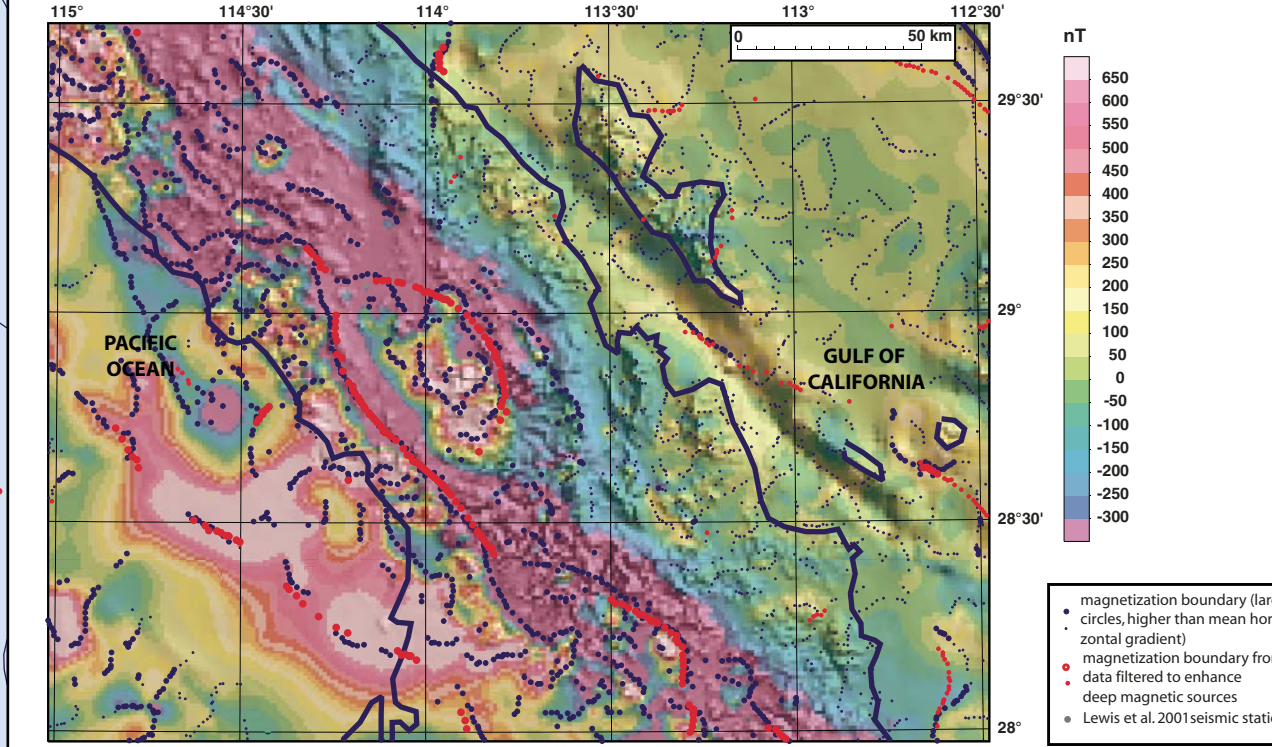

Aeromagnetic map (North American Magnetic Map, 2002) overlain on shaded-relief topography (Becker et al., 2009).

# RECONNAISSANCE GEOLOGIC MAP of the State of BAJA CALIFORNIA

PREPARED BY STUDENTS AND STAFF OF THE UNIVERSIDAD AUTONOMA DE BAJA CALIFORNIA AND SAN DIEGO STATE UNIVERSITY

COMPILED BY R. GORDON GASTIL, RICHARD P. PHILLIPS, AND EDWIN C. ALLISON

SCALE 1:250,000

1971

0 5 KILOMETERS

FOR SOURCES AND ACKNOWLEDGEMENTS SEE GEOLOGICAL SOCIETY OF AMERICA MEMOIR 140

## LEGEND

### ROCK UNITS

#### POST-BATOLITHIC

##### SEDIMENTARY ROCKS

QUATERNARY  
al, alluvium; Qd, dunes

Qm, marino; Qf, fluvial  
Ql, lacustre

PLIOCENE  
Tm, marino; Tpl, fluvial

MIOCENE  
Tm, marino; Tmf, fluvial

LOWER TERTIARY  
Tc, Escabe; Tm, Paleozoico  
m, marino; f, fluvial  
Tc, conglomerado

UPPER CRETACEOUS  
Kt, Grupo Rosario  
m, marino; f, fluvial  
Kc, Formación Redondo

#### POST-BATOLITHIC VOLCANIC ROCKS

Qb, Cuaternario basalto

Tpb, Plioceno basalto y andesito andesito

Tmb, Mioceno basalto y andesito basáltico

Tp, Plioceno; Tm, Mioceno  
v, volcánicos no diferenciados; u, andesito  
v, riolito y dacito

#### BATOLITHIC ROCKS

ad, adamello y granito

gd, granodiorito

t, tonalita

gr, no diferenciada

gb, gabro

d, diabasa

#### PRE-BATOLITHIC ROCKS

Ka, Formación Altiplano

u, andesito; v, volcánico

m, caliza

Ja, T. Jurásico ?

pbv, volcánicos no diferenciados

plm, metasedimentario

plv, secuencia Paleozoica ?

sl, gneiso; om, omphacitita

sch, esquistos; gn, gneis

ph, gneis

ph, no diferenciado

mp, plúcticas y metamórficas mezcladas

• K.A. 501 Localización de las

muestras analizadas

### SÍMBOLOS

#### CONTACTS OF ROCK UNITS

Dashed where approximate

measured photo interpretation

horizontal vertical

FOLIATION

measured observed

joint

Trend in phosnic rocks

Trend in pre-batolitic rocks

#### FOLDS

Anticline

Syncline

#### FAULTS

covered uncertain observed

Strike-slip

Unidentified

Explosive center

Dike

Mine or prospect

Spring

Wall

Drainage

Habitación

Airport

Trail

Recreo

Improved road

Unimproved road
